# Supplementary material for: Facile synthesis of diverse graphene nanomeshes based on simultaneous regulation of pore size and surface structure
Source: PubMed Central journal article supplement (PMC4999802; doi:10.1038/srep32310), 2016-08-26
Supplement: srep32310-s1.pdf [file srep32310-s1.pdf]

## **Facile synthesis of diverse graphene nanomeshes based on simultaneous regulation of pore size and surface structure**

Jia Zhang,<sup>1,2</sup> Huaibing Song,<sup>3</sup> Dawen Zeng,<sup>1,2\*</sup> Hao Wang,<sup>1</sup> Ziyu Qin,<sup>1</sup> Keng Xu,<sup>1</sup>  
Aimin Pang,<sup>4</sup> and Changsheng Xie<sup>1</sup>

<sup>1</sup>) State Key Laboratory of Material Processing and Die & Mould Technology, Nanomaterials and Smart Sensors Research Laboratory, Department of Materials Science and Engineering, Huazhong University of Science and Technology, Wuhan 430074, PR China.

<sup>2</sup>) Hubei Collaborative Innovation Center for Advanced Organic Chemical Materials, Wuhan 430062, PR China.

<sup>3</sup>) Wuhan National Laboratory for Optoelectronics (WNLO), Huazhong University of Science and Technology, Wuhan 430074, PR China.

<sup>4</sup>) Hubei Institute of Aerospace Chemotechnology, No. 58, Qinghe Road, Xiangyang 441003, PR China.

\* Corresponding author: E-mail: dwzeng@mail.hust.edu.cn; Fax: +86-027-87543778; Tel: +86-027-87559835

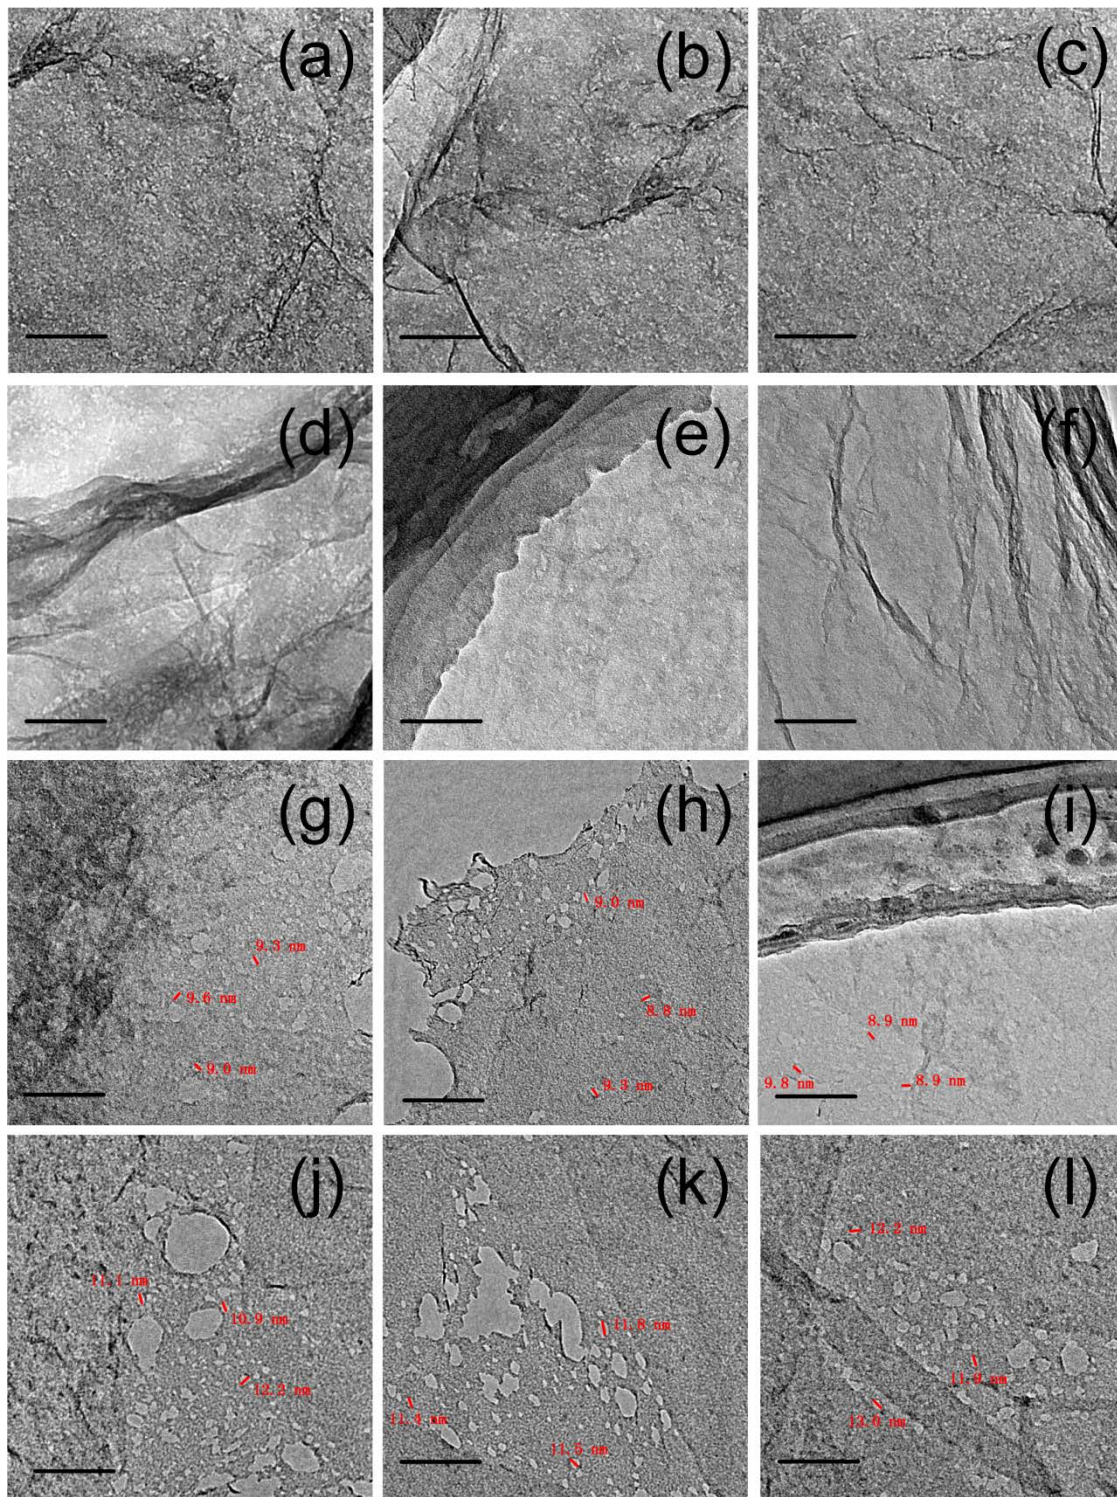

Fig S1. Three representative images of each sample were selected for statistical analysis, (a-c) for GNM-2h, (d-f) for GNM-3h, (g-i) for GNM-4h, (j-l) for GNM-5h. For GNM-4,5h, three nanopores of each image were marked with length dimension to facilitate the size estimate of adjacent nanopores. Scale bars are 100nm in (a-l).

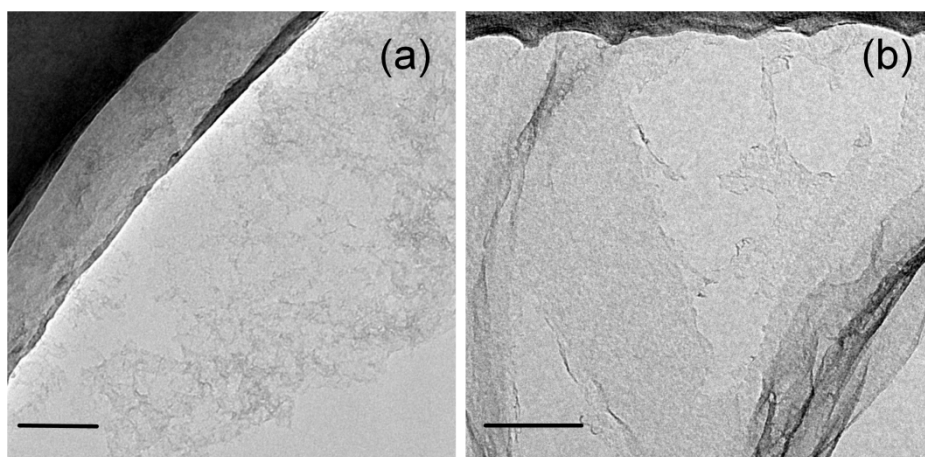

Fig S2. The TEM image for GNM-6h. Scale bars are 200nm in (a-b) and 100nm in (c).
